# Supplementary material for: STEPS: efficient simulation of stochastic reaction–diffusion models in realistic morphologies
Source: PubMed Central journal article supplement (PMC3472240; doi:10.1186/1752-0509-6-36), 2012-05-10
Supplement: 1752-0509-6-36-S4.pdf [file 1752-0509-6-36-S4.pdf]

## 4. Validation

All the validations shown were run with STEPS version 1.3.0. Meshes were generated with CUBIT, version 12.0 [32].

### First-order irreversible reaction:

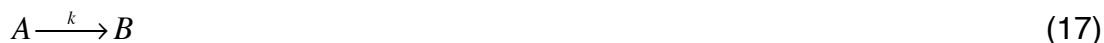

The mean and standard deviation of the number of molecules of reactant A is given by the analytical solutions to the master equation [17]:

$$N(t) = N_0 e^{-kt}, \quad \sigma(t) = \sqrt{N_0 e^{-kt} (1 - e^{-kt})} \quad (18), (19)$$

The model is implemented as a Wmdirect solver object with  $k = 5/\text{s}$ ,  $N_0 = 50$  and volume  $= 1 \mu\text{m}^3$ .

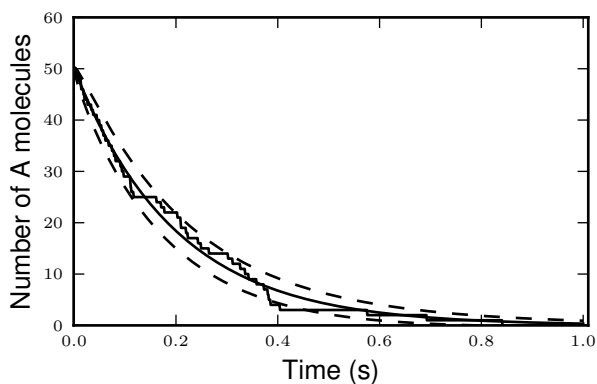

The figure above shows a single iteration of this model (thick line) compared to the analytical solution (broken lines: standard deviation of the stochastic simulation), while figure 6A shows the average of 1000 iterations.

### First-order reversible reaction:

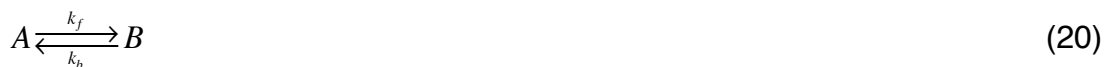

The equilibrium concentrations can be computed from  $d[A]/dt = d[B]/dt = 0$ :

$$\frac{[A]_{eq}}{[A]_0} = \frac{\frac{k_b}{k_f}}{1 + \frac{k_b}{k_f}} \quad (21)$$

The model is implemented as a Wmdirect solver object with  $k_f = 10/s$ ,  $k_b = 2/s$ ,  $[A]_0 = 27.5 \mu M$ ,  $[B]_0 = 0 \mu M$  and volume =  $6 \mu m^3$ .

Figure 6B shows that the STEPS simulation evolves to the expected equilibrium concentrations, mean of 100 iterations shown.

### Second order irreversible reaction:

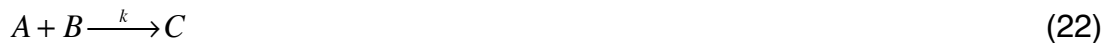

if  $[A]_0 = [B]_0$  then:

$$\frac{1}{[A]} = kt + \frac{1}{[A]_0} \quad (23)$$

and a plot of  $1/[A]$  vs time should be a straight line with slope  $k$  and intercept  $1/[A]_0$ . This is shown in figure 6C for a model implemented as a Wmdirect solver object with  $k = 50/\mu M.s$ ,  $[A]_0 = [B]_0 = 20 \mu M$  and volume =  $9 \mu m^3$ . Mean of 100 iterations is shown.

If  $[A]_0 \neq [B]_0$  then:

$$\ln\left(\frac{[B]}{[A]}\right) = \ln\left(\frac{[B]_0}{[A]_0}\right) - ([A]_0 - [B]_0)kt \quad (24)$$

Figure 6D shows the STEPS simulation compared to this analytical solution for a model implemented as a Wmdirect solver object with  $k = 5/\mu M.s$ ,  $[A]_0 = 1 \mu M$ ,  $[B]_0 = 0.5 \mu M$  and volume =  $9 \mu m^3$ . Mean of 100 iterations is shown.

### Production and degradation reactions

We consider simultaneous degradation and production:

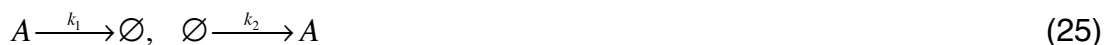

The stationary distribution found from the steady-state version of the master equation is given by (adapted from [38]):

$$\Phi(n) = \frac{1}{n!} \left( \frac{k_2}{k_1} \right)^n \exp \left[ -\frac{k_2}{k_1} \right] \quad (26)$$

Figure 7 compares the stationary distribution from the STEPS simulation (histogram) with analytical solution (solid line) for a model implemented as a Wmdirect solver object with  $k_1 = 10/s$ ,  $k_2 = 0.17\mu M/s$ , based on mean measurements of 100 iterations of simulations for 10,000 seconds and sampling the population of A every 0.1 seconds.

### 3D diffusion in infinite volume

The analytical solution for 3D diffusion from an instantaneous point source in an infinite volume is well known [47]:

$$C(r,t) = \frac{M}{8(\pi Dt)^{3/2}} \exp \left( \frac{-r^2}{4Dt} \right) \quad (27)$$

where  $C$  is concentration,  $M$  is the number or amount of molecules,  $D$  is the diffusion constant and  $r$  is the radial distance from source.

To approximate this type of diffusion we created a tetrahedral mesh of sphere radius 10  $\mu m$  in CUBIT with 32,552 voxels. This was simulated with the 'Tetexact' solver in STEPS using  $D = 20 \mu m^2/s$  (Figure 8A). The initial condition was 5,000,000 molecules into the center tetrahedron. This simulation was run to 0.2 seconds, ensuring no boundary events occurred. Data in Figure 8A are mean of 10 iterations, sampled concentration in 10000 voxels selected at random, but with a bias towards central voxels. We spatially averaged spherical shells with a width 0.33  $\mu m$  at the indicated radius.

The small deviation from the analytical solution in the first time bins is due to the initial concentration not being into an infinitely small volume. This is supported by the fact that the deviation depends on the size of this central voxel (not shown).

### 1D diffusion in a finite tube from a point source at one end

The analytical solution for 1D diffusion from the boundary ( $x = 0$ ) in a finite tube was found by applying our boundary conditions to the general solution in [47]:

$$C = C_0 \left[ 1 + 2 \sum_{n=1}^{\infty} \cos \left( \frac{n\pi x}{L} \right) \exp \left\{ - \left( \frac{n\pi}{L} \right)^2 Dt \right\} \right] \quad (28)$$

The number of significant terms in the sum (from 1 to infinity) depends on the size of the exponential term, and therefore the time, but except for very early times only the first few terms are significant. It was found that for the times plotted fewer than 10 terms were significant, and 100 terms are summed to ensure accuracy.

To approximate this type of diffusion we created a tetrahedral mesh of a cylinder, radius  $0.2 \mu\text{m}$ , length  $10 \mu\text{m}$  (in CUBIT) with 12,033 voxels. This was simulated with the Tetexact solver in STEPS using  $D = 200 \mu\text{m}^2/\text{s}$ . As initial condition we injected 250,000 molecules uniformly over all tetrahedra with a face on the  $x = 0$  boundary. This simulation was run to 0.15 seconds, when the concentration gradient had become close to zero everywhere. Data in Figure 8B are mean of 10 iterations, with the concentration sampled in all voxels in  $0.5 \mu\text{m}$  bins (each bin containing about 600 voxels).

### 1D diffusion in a semi-infinite tube with clamped concentration

The analytical solution for 1D diffusion in a semi-infinite tube with a clamped concentration at the boundary ( $x = 0$ ) is [47]:

$$C(x,t) = C_0 \left[ 1 - \text{erf} \left( \frac{x}{2\sqrt{Dt}} \right) \right] \quad (29)$$

where erf is the error-function.

This was simulated with the same mesh as the previous simulation, using the Tetexact solver in STEPS with  $D = 100 \mu\text{m}^2/\text{s}$ . The concentration in all tetrahedra with a face on the  $x = 0$  boundary was clamped to 1 mM using the setTetClamped() method, initial condition was zero concentration elsewhere. This simulation was run to 0.05 seconds, ensuring no boundary events. Data in Figure 8C are mean of 10 iterations, with the concentration sampled in all voxels in  $0.33 \mu\text{m}$  bins.

### 1D diffusion in a finite tube with constant influx at both ends

The analytical solution for 1D diffusion in a finite tube with a constant and equal influx of the same species of molecules at both ends is [68]:

$$C(x,t) = \frac{JL}{D} \left\{ \frac{Dt}{L^2} + \frac{3x^2 - L^2}{6L^2} - \frac{2}{\pi^2} \sum_{n=1}^{\infty} \frac{(-1)^n}{n^2} \exp \left[ -D \left( \frac{n\pi}{L} \right)^2 t \right] \cos \left( \frac{n\pi x}{L} \right) \right\} \quad (30)$$

where the tube has a dimension from  $-L$  to  $L$  and  $J$  is the diffusion flux (number of molecules per  $\text{m}^2\text{s}$ ). Again, only the first few terms are significant in the sum.

This was simulated with the same mesh as the previous simulations, using the Tetexact solver in STEPS with  $D = 50 \mu\text{m}^2/\text{s}$ . Initial condition was zero concentration everywhere. To simulate the constant influx a reaction scheme was set up in all 50 tetrahedra with a face on the  $x = \pm L$  boundaries. This reaction  $A \rightarrow X$  created a constant source of  $X$  molecules because the the number of  $A$  was clamped to 1 in each tetrahedron; the reaction rate was set at 12000/s to generate a total flux over the border of the tube of 300,000/s. This simulation was run to 0.15 seconds. Data in Figure 8D are mean of 30 iterations, with the concentration sampled in all voxels in  $0.5 \mu\text{m}$  bins.

### Lack of effect of diffusion on a first-order irreversible reaction

The reaction of equation 17, with  $k = 1/s$  and  $[A]_0 = 40 \text{ nM}$  (uniform distribution), was implemented in a tetrahedral mesh of a sphere with a  $1 \mu\text{m}$  radius (volume =  $4.1 \mu\text{m}^3$ , 9457 voxels) and run using the Tetexact solver with  $D = 1 \mu\text{m}^2/s$ . Data in Figure 9A are mean of 1000 iterations.

### Lack of effect of slow diffusion on discrete production-degradation system

To investigate the effect of diffusion and subvolume size on a very discrete reaction-diffusion problem we implemented a model of simultaneous degradation and production, differing from (25) in that the degradation reaction is second-order:

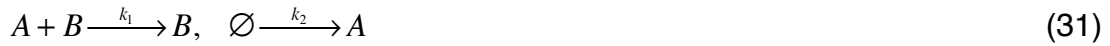

The stationary distribution found from the steady-state version of the master equation is given by [38]:

$$\Phi(n) = \frac{1}{n!} \left( \frac{k_2 v^2}{k_1 B_0} \right)^n \exp \left[ - \frac{k_2 v^2}{k_1 B_0} \right] \quad (32)$$

The diffusion coefficient of molecules A and B was set to the low value  $D = 10 \mu\text{m}^2/s$  and the reaction constant for the second-order reaction was set to the value of  $k_1 = 100/\mu\text{M}\cdot\text{s}$  and the production rate was set to  $k_2 = 4\text{nM}/\text{s}$ . With the initial injection of just 1 B molecule these reaction parameters are expected to keep the mean number of molecules in the system at fewer than 10. The lower bound for acceptable tetrahedron size for the well-mixed condition was estimated as  $0.2\mu\text{m}$  (see Subvolume Size) and the model was simulated in a uniform mesh of 73 tetrahedrons representing a total volume of  $1\mu\text{m}^3$ , corresponding to a tetrahedron size of approximately  $0.5\mu\text{m}$ .

Figure 9B compares the stationary distribution from the STEPS simulation (histogram) with analytical solution (white circles) for a model implemented as a Tetexact solver object with based on a simulation for 300,000 seconds and sampling the population of A every second.

### Degradation-diffusion process with initially separated reactants

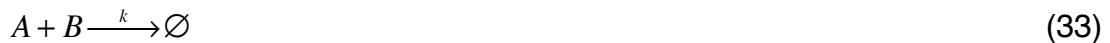

Though this is a reaction-diffusion model, the assumption for the analytical approximation is that the reaction zone is much smaller than the diffusion length. This gives the boundary condition (at  $x = 0$ ) that the concentration is clamped to zero. The solution then doesn't include any reaction term [48]:

$$N_A = -\frac{4N_{A0}}{\pi} \sum_{n=0}^{\infty} \frac{1}{2n+1} \exp\left[-\frac{D(2n+1)^2 \pi^2 t}{4L^2}\right] \cdot \sin\left[\frac{(2n+1)\pi x}{2L}\right] \quad (34)$$

Except at very early times, only the first few terms are significant (for the plotted time-points at most 5 terms were significant), for Figure 10 the first 100 terms were computed. The reaction rate was set very high,  $k = 100,000/\mu\text{M}\cdot\text{s}$ , to enforce the boundary condition. Simulation using the Tetexact solver on a square cuboid of  $40 \mu\text{m}$  by  $4 \mu\text{m}$  by  $4 \mu\text{m}$  (11713 voxels) was run to 0.4 seconds. Reactants A and B were uniformly distributed initially in different  $20 \mu\text{m}$  halves of this square cuboid, 1,000,000 molecules of each, with  $D_A = D_B = 400 \mu\text{m}^2/\text{s}$ . Data in Figure 10 are mean and SD of 10 iterations.

#### 4.1 Statistical analysis

Below is a table of statistical analysis of the reaction validation models. In the first 5 models the output from STEPS at every time-point (except where equilibrium must first be reached in the first-order reversible reaction model) is analyzed and in the last model output from molecule number 3-18 is analyzed. In each case the output is converted to a 95% confidence interval, assuming a normal distribution in each case, then compared to the analytical mean value, with a summary of whether the true mean fell within the confidence interval of the STEPS output:

|      |                                     | <b>First order irreversible reaction</b> |                 |                                                  |
|------|-------------------------------------|------------------------------------------|-----------------|--------------------------------------------------|
| Time | 95% confidence interval lower-bound | 95% confidence interval upper-bound      | Analytical mean | Analytical mean fell within confidence interval? |
| 0.05 | 38.744684097                        | 39.1173159031                            | 38.940039154    | YES                                              |
| 0.1  | 30.134684232                        | 30.579315768                             | 30.326532986    | YES                                              |
| 0.15 | 23.355250752                        | 23.812749248                             | 23.618327637    | YES                                              |
| 0.2  | 18.091665084                        | 18.5263349162                            | 18.393972059    | YES                                              |
| 0.25 | 14.119285808                        | 14.5167141918                            | 14.325239843    | YES                                              |
| 0.3  | 10.902995444                        | 11.2710045557                            | 11.156508007    | YES                                              |
| 0.35 | 8.4908882166                        | 8.82711178338                            | 8.6886971725    | YES                                              |

|                        |                                               |                                                |                    |                                                              |
|------------------------|-----------------------------------------------|------------------------------------------------|--------------------|--------------------------------------------------------------|
| 0.4                    | 6.6697753747                                  | 6.97222462529                                  | 6.7667641618       | YES                                                          |
| 0.45                   | 5.1707725514                                  | 5.43922744861                                  | 5.2699612281       | YES                                                          |
| 0.5                    | 3.9865402269                                  | 4.22545977307                                  | 4.1042499312       | YES                                                          |
| 0.55                   | 3.0837803144                                  | 3.29821968565                                  | 3.1963930603       | YES                                                          |
| 0.6                    | 2.3854203342                                  | 2.57257966582                                  | 2.4893534184       | YES                                                          |
| 0.65                   | 1.8237929174                                  | 1.98820708256                                  | 1.9387103916       | YES                                                          |
| 0.7                    | 1.3880711681                                  | 1.53392883193                                  | 1.5098691711       | YES                                                          |
| 0.75                   | 1.0945365863                                  | 1.22346341374                                  | 1.1758872928       | YES                                                          |
| 0.8                    | 0.8573955033                                  | 0.9726044967                                   | 0.9157819444       | YES                                                          |
| 0.85                   | 0.679300744                                   | 0.78069925601                                  | 0.7132116955       | YES                                                          |
| 0.9                    | 0.5234014941                                  | 0.61459850592                                  | 0.5554498269       | YES                                                          |
| 0.95                   | 0.4183415019                                  | 0.49965849813                                  | 0.4325847602       | YES                                                          |
| 1.0                    | 0.3214190624                                  | 0.39258093762                                  | 0.33689735         | YES                                                          |
| TOTAL:<br>YES 20, NO 0 |                                               |                                                |                    |                                                              |
|                        |                                               | <b>First order<br/>reversible<br/>reaction</b> |                    |                                                              |
| Time                   | 95%<br>confidence<br>interval lower-<br>bound | 95% confidence<br>interval upper-<br>bound     | Analytical<br>mean | Analytical<br>mean fell<br>within<br>confidence<br>interval? |
| 0.7                    | 4.6036826842                                  | 4.61500361428                                  | 4.6126079531       | YES                                                          |
| 0.7                    | 23.060644105                                  | 23.0719650346                                  | 23.063039766       | YES                                                          |
| 0.75                   | 4.6043764498                                  | 4.61783019099                                  | 4.6126079531       | YES                                                          |
| 0.75                   | 23.057817528                                  | 23.0712712689                                  | 23.063039766       | YES                                                          |
| 0.8                    | 4.6056777058                                  | 4.61746437197                                  | 4.6126079531       | YES                                                          |

|                        |                                               |                                                                                          |                    |                                                              |
|------------------------|-----------------------------------------------|------------------------------------------------------------------------------------------|--------------------|--------------------------------------------------------------|
| 0.8                    | 23.058183347                                  | 23.069970013                                                                             | 23.063039766       | YES                                                          |
| 0.85                   | 4.6055743972                                  | 4.61749018869                                                                            | 4.6126079531       | YES                                                          |
| 0.85                   | 23.05815753                                   | 23.0700733216                                                                            | 23.063039766       | YES                                                          |
| 0.9                    | 4.6076281608                                  | 4.62048999841                                                                            | 4.6126079531       | YES                                                          |
| 0.9                    | 23.05515772                                   | 23.068019558                                                                             | 23.063039766       | YES                                                          |
| 0.95                   | 4.6025742023                                  | 4.61540913469                                                                            | 4.6126079531       | YES                                                          |
| 0.95                   | 23.060238584                                  | 23.0730735165                                                                            | 23.063039766       | YES                                                          |
| 1.0                    | 4.6015430629                                  | 4.6149015081                                                                             | 4.6126079531       | YES                                                          |
| 1.0                    | 23.060746211                                  | 23.0741046559                                                                            | 23.063039766       | YES                                                          |
| TOTAL:<br>YES 14, NO 0 |                                               |                                                                                          |                    |                                                              |
|                        |                                               |                                                                                          |                    |                                                              |
|                        |                                               |                                                                                          |                    |                                                              |
|                        |                                               | <b>Second order<br/>irreversible<br/>reaction, equal<br/>reactant<br/>concentrations</b> |                    |                                                              |
| Time                   | 95%<br>confidence<br>interval lower-<br>bound | 95% confidence<br>interval upper-<br>bound                                               | Analytical<br>mean | Analytical<br>mean fell<br>within<br>confidence<br>interval? |
| 0.05                   | 2.539519881                                   | 2.5523868382                                                                             | 2.55               | YES                                                          |
| 0.05                   | 2.5395680842                                  | 2.55255391225                                                                            | 2.55               | YES                                                          |
| 0.1                    | 5.043140848                                   | 5.08198146778                                                                            | 5.05               | YES                                                          |
| 0.1                    | 5.0434765087                                  | 5.08249705507                                                                            | 5.05               | YES                                                          |
| 0.15                   | 7.5427551473                                  | 7.59586099149                                                                            | 7.55               | YES                                                          |
| 0.15                   | 7.5436830851                                  | 7.59683608527                                                                            | 7.55               | YES                                                          |



|      |              |               |       |     |
|------|--------------|---------------|-------|-----|
| 0.2  | 10.02709062  | 10.1179681989 | 10.05 | YES |
| 0.2  | 10.028538974 | 10.1198898363 | 10.05 | YES |
| 0.25 | 12.47888696  | 12.5988567069 | 12.55 | YES |
| 0.25 | 12.481374448 | 12.6015918148 | 12.55 | YES |
| 0.3  | 14.948654619 | 15.1169544679 | 15.05 | YES |
| 0.3  | 14.952430006 | 15.1206860992 | 15.05 | YES |
| 0.35 | 17.308230602 | 17.5242073801 | 17.55 | NO  |
| 0.35 | 17.312529629 | 17.5299849158 | 17.55 | NO  |
| 0.4  | 19.856894394 | 20.127814938  | 20.05 | YES |
| 0.4  | 19.862843202 | 20.1351446952 | 20.05 | YES |
| 0.45 | 22.24392394  | 22.6063168648 | 22.55 | YES |
| 0.45 | 22.251207929 | 22.6157403324 | 22.55 | YES |
| 0.5  | 24.706206074 | 25.1322063397 | 25.05 | YES |
| 0.5  | 24.715126337 | 25.1439174051 | 25.05 | YES |
| 0.55 | 27.188368771 | 27.6969714823 | 27.55 | YES |
| 0.55 | 27.200659889 | 27.7097028076 | 27.55 | YES |
| 0.6  | 29.673740905 | 30.2414409438 | 30.05 | YES |
| 0.6  | 29.689993412 | 30.2550085232 | 30.05 | YES |
| 0.65 | 32.175337911 | 32.7650808522 | 32.55 | YES |
| 0.65 | 32.194200561 | 32.7812516956 | 32.55 | YES |
| 0.7  | 34.667617847 | 35.2894954158 | 35.05 | YES |
| 0.7  | 34.690902547 | 35.3068676976 | 35.05 | YES |
| 0.75 | 37.119640546 | 37.8240451564 | 37.55 | YES |
| 0.75 | 37.147340414 | 37.8430068706 | 37.55 | YES |
| 0.8  | 39.480622752 | 40.241777042  | 40.05 | YES |

|                        |                                               |                                                                                                |                    |                                                              |
|------------------------|-----------------------------------------------|------------------------------------------------------------------------------------------------|--------------------|--------------------------------------------------------------|
| 0.8                    | 39.513904099                                  | 40.2612997576                                                                                  | 40.05              | YES                                                          |
| 0.85                   | 42.056050498                                  | 42.9224278653                                                                                  | 42.55              | YES                                                          |
| 0.85                   | 42.091177559                                  | 42.9472997293                                                                                  | 42.55              | YES                                                          |
| 0.9                    | 44.604884118                                  | 45.6069559282                                                                                  | 45.05              | YES                                                          |
| 0.9                    | 44.639618606                                  | 45.6398408762                                                                                  | 45.05              | YES                                                          |
| 0.95                   | 47.114528389                                  | 48.2144198127                                                                                  | 47.55              | YES                                                          |
| 0.95                   | 47.154310926                                  | 48.2501486764                                                                                  | 47.55              | YES                                                          |
| 1.0                    | 49.55734391                                   | 50.6724730108                                                                                  | 50.05              | YES                                                          |
| 1.0                    | 49.603597641                                  | 50.7096977505                                                                                  | 50.05              | YES                                                          |
| TOTAL:<br>YES 38, NO 2 |                                               |                                                                                                |                    |                                                              |
|                        |                                               |                                                                                                |                    |                                                              |
|                        |                                               | <b>Second order<br/>irreversible<br/>reaction,<br/>unequal<br/>reactant<br/>concentrations</b> |                    |                                                              |
| Time                   | 95%<br>confidence<br>interval lower-<br>bound | 95% confidence<br>interval upper-<br>bound                                                     | Analytical<br>mean | Analytical<br>mean fell<br>within<br>confidence<br>interval? |
| 0.05                   | -0.819968301                                  | -0.8177259198                                                                                  | -0.818147181       | YES                                                          |
| 0.1                    | -0.9471777392                                 | -0.9438354641                                                                                  | -0.943147181       | NO                                                           |
| 0.15                   | -1.0712144417                                 | -1.06704414112                                                                                 | -1.068147181       | YES                                                          |
| 0.2                    | -1.1965678408                                 | -1.19089961611                                                                                 | -1.193147181       | YES                                                          |
| 0.25                   | -1.3215196978                                 | -1.3144182997                                                                                  | -1.318147181       | YES                                                          |
| 0.3                    | -1.4466412619                                 | -1.4389451409                                                                                  | -1.443147181       | YES                                                          |
| 0.35                   | -1.5719361037                                 | -1.5636269921                                                                                  | -1.568147181       | YES                                                          |

|                            |                                                         |                                                     |                            |                                                                         |
|----------------------------|---------------------------------------------------------|-----------------------------------------------------|----------------------------|-------------------------------------------------------------------------|
| 0.4                        | -1.69917606                                             | -1.6894532048                                       | -1.693147181               | YES                                                                     |
| 0.45                       | -1.8229894905                                           | -1.81190076831                                      | -1.818147181               | YES                                                                     |
| 0.5                        | -1.9481134542                                           | -1.9357071361                                       | -1.943147181               | YES                                                                     |
| 0.55                       | -2.0750802832                                           | -2.0615550592                                       | -2.068147181               | YES                                                                     |
| 0.6                        | -2.2033233424                                           | -2.188294371                                        | -2.193147181               | YES                                                                     |
| 0.65                       | -2.3304321809                                           | -2.3135180564                                       | -2.318147181               | YES                                                                     |
| 0.7                        | -2.4577523544                                           | -2.4388364304                                       | -2.443147181               | YES                                                                     |
| 0.75                       | -2.5883975157                                           | -2.5678899036                                       | -2.568147181               | YES                                                                     |
| 0.8                        | -2.7100621734                                           | -2.6871569793                                       | -2.693147181               | YES                                                                     |
| 0.85                       | -2.836923514                                            | -2.812745443                                        | -2.818147181               | YES                                                                     |
| 0.9                        | -2.9646697549                                           | -2.9383024571                                       | -2.943147181               | YES                                                                     |
| 0.95                       | -3.0842700765                                           | -3.0546526957                                       | -3.068147181               | YES                                                                     |
| 1.0                        | -3.2082728617                                           | -3.1754686224                                       | -3.193147181               | YES                                                                     |
| TOTAL:<br>YES 19, NO 1     |                                                         |                                                     |                            |                                                                         |
|                            |                                                         |                                                     |                            |                                                                         |
|                            |                                                         | <b>Production-<br/>degradation</b>                  |                            |                                                                         |
| <b>Molecule<br/>number</b> | <b>95%<br/>confidence<br/>interval lower-<br/>bound</b> | <b>95% confidence<br/>interval upper-<br/>bound</b> | <b>Analytical<br/>mean</b> | <b>Analytical<br/>mean fell<br/>within<br/>confidence<br/>interval?</b> |
| 3                          | 0.0075097101                                            | 0.00761646478                                       | 0.007566655                | YES                                                                     |
| 4                          | 0.0188291642                                            | 0.01900308977                                       | 0.0189166374               | YES                                                                     |
| 5                          | 0.0377693963                                            | 0.03803805307                                       | 0.0378332748               | YES                                                                     |
| 6                          | 0.0628159356                                            | 0.06312935028                                       | 0.063055458                | YES                                                                     |
| 7                          | 0.0898295042                                            | 0.09021794278                                       | 0.0900792257               | YES                                                                     |

|                        |                                               |                                                                 |                    |                                                              |
|------------------------|-----------------------------------------------|-----------------------------------------------------------------|--------------------|--------------------------------------------------------------|
| 8                      | 0.1125394679                                  | 0.11295717382                                                   | 0.1125990321       | YES                                                          |
| 9                      | 0.1248865409                                  | 0.12528613006                                                   | 0.1251100357       | YES                                                          |
| 10                     | 0.1249197956                                  | 0.1253189407                                                    | 0.1251100357       | YES                                                          |
| 11                     | 0.11334011298                                 | 0.11376472081                                                   | 0.1137363961       | YES                                                          |
| 12                     | 0.0946421873                                  | 0.09505301095                                                   | 0.0947803301       | YES                                                          |
| 13                     | 0.0728228553                                  | 0.07316867636                                                   | 0.0729079462       | YES                                                          |
| 14                     | 0.051939112                                   | 0.0522077934                                                    | 0.0520771044       | YES                                                          |
| 15                     | 0.0345789859                                  | 0.03482952857                                                   | 0.0347180696       | YES                                                          |
| 16                     | 0.0215999637                                  | 0.02179699933                                                   | 0.0216987935       | YES                                                          |
| 17                     | 0.0126535429                                  | 0.01279184802                                                   | 0.0127639962       | YES                                                          |
| 18                     | 0.0070919661                                  | 0.00719978271                                                   | 0.007091109        | NO                                                           |
| TOTAL: YES<br>15, NO 1 |                                               |                                                                 |                    |                                                              |
|                        |                                               |                                                                 |                    |                                                              |
|                        |                                               | <b>First order<br/>irreversible<br/>reaction-<br/>diffusion</b> |                    |                                                              |
| Time                   | 95%<br>confidence<br>interval lower-<br>bound | 95% confidence<br>interval upper-<br>bound                      | Analytical<br>mean | Analytical<br>mean fell<br>within<br>confidence<br>interval? |
| 0.1                    | 36.108362959                                  | 36.255082315                                                    | 36.176022112       | YES                                                          |
| 0.2                    | 32.624546949                                  | 32.8070467145                                                   | 32.733418443       | YES                                                          |
| 0.3                    | 29.41207441                                   | 29.6234088559                                                   | 29.618421827       | YES                                                          |
| 0.4                    | 26.632749961                                  | 26.8590111661                                                   | 26.799856333       | YES                                                          |
| 0.5                    | 24.052918916                                  | 24.2837323567                                                   | 24.249512808       | YES                                                          |
| 0.6                    | 21.825357739                                  | 22.0670403028                                                   | 21.941866558       | YES                                                          |

|                        |               |               |              |     |
|------------------------|---------------|---------------|--------------|-----|
| 0.7                    | 19.770319637  | 20.014462564  | 19.853821883 | YES |
| 0.8                    | 17.851727617  | 18.0997062596 | 17.964480931 | YES |
| 0.9                    | 16.152458536  | 16.3910215326 | 16.254934542 | YES |
| 1.0                    | 14.641077975  | 14.8718659756 | 14.708073001 | YES |
| 1.1                    | 13.263547345  | 13.4851318668 | 13.308414799 | YES |
| 1.2                    | 11.9830111675 | 12.2029059712 | 12.041951684 | YES |
| 1.3                    | 10.840727898  | 11.0582939116 | 10.89600847  | YES |
| 1.4                    | 9.8184304718  | 10.0327805206 | 9.8591161711 | YES |
| 1.5                    | 8.859773598   | 9.06596748093 | 8.9208972204 | YES |
| 1.6                    | 7.9831987698  | 8.18339205609 | 8.0719616074 | YES |
| 1.7                    | 7.2198227065  | 7.41310894419 | 7.3038128994 | YES |
| 1.8                    | 6.5206763632  | 6.70493508496 | 6.6087632057 | YES |
| 1.9                    | 5.8880501516  | 6.06617543188 | 5.9798562354 | YES |
| 2.0                    | 5.3517201552  | 5.52222725008 | 5.4107976763 | YES |
| 2.1                    | 4.8349779693  | 4.99867194545 | 4.8958921989 | YES |
| 2.2                    | 4.3512639524  | 4.50925602688 | 4.4299864563 | YES |
| 2.3                    | 3.9396401839  | 4.09008110765 | 4.008417507  | YES |
| 2.4                    | 3.564965386   | 3.70832129677 | 3.6269661475 | YES |
| 2.5                    | 3.2521390223  | 3.38945279689 | 3.2818146842 | YES |
| 2.6                    | 2.9342166583  | 3.06528531851 | 2.9695087253 | YES |
| 2.7                    | 2.651587021   | 2.7769907373  | 2.6869226078 | YES |
| 2.8                    | 2.3990640385  | 2.51856053266 | 2.4312281149 | YES |
| 2.9                    | 2.186575462   | 2.30245613838 | 2.1998661702 | YES |
| 3.0                    | 1.9823757801  | 2.09165628333 | 1.9905212255 | YES |
| TOTAL:<br>YES 30, NO 0 |               |               |              |     |
